# Supplementary material
Source: HighWire-hosted journal article supplement (https://cmaj.ca/highwire/filestream/57742/field_highwire_adjunct_files/5/hyper-hemmel-appendix_6.pdf)
Supplement: hyper-hemmel-appendix_6.pdf [file hyper-hemmel-appendix_6.pdf]

**Appendix 6:** Description of randomized trials of combination therapy for management of acute hyperkalemia

| Author, year, number of subjects (N)                                                                                                                                                                                                                                                                               | Study design   | Study population                            | Hyperkalemia definition                  | Intervention                                                                                                                                                                                                                                 | Comparator                                                                                                                                                                                                                          | K <sup>+</sup> baseline (mmol/L)*<br>t = 0 min (SD)                                                                                                                                                                                          | K <sup>+</sup> treatment (mmol/L)*<br>t = 30 min (SD)<br>t = 60 min (SD)                                                                                                                                                                                                                             |
|--------------------------------------------------------------------------------------------------------------------------------------------------------------------------------------------------------------------------------------------------------------------------------------------------------------------|----------------|---------------------------------------------|------------------------------------------|----------------------------------------------------------------------------------------------------------------------------------------------------------------------------------------------------------------------------------------------|-------------------------------------------------------------------------------------------------------------------------------------------------------------------------------------------------------------------------------------|----------------------------------------------------------------------------------------------------------------------------------------------------------------------------------------------------------------------------------------------|------------------------------------------------------------------------------------------------------------------------------------------------------------------------------------------------------------------------------------------------------------------------------------------------------|
| Allon, 1990 (n=12) <sup>1</sup>                                                                                                                                                                                                                                                                                    | RCT cross-over | Patients on chronic hemodialysis            | Pre-dialysis K <sup>+</sup> > 5.0 mmol/L | Insulin 10U IV + nebulized albuterol 20 mg                                                                                                                                                                                                   | <ul style="list-style-type: none"> <li>• Insulin 10U IV + dextrose</li> <li>• Nebulized albuterol 20 mg</li> </ul>                                                                                                                  | 5.89 (0.87)                                                                                                                                                                                                                                  | 5.04 (NR)<br>4.68 (NR)                                                                                                                                                                                                                                                                               |
| Allon, 1996 (n=8) <sup>2</sup>                                                                                                                                                                                                                                                                                     | RCT cross-over | Patients on chronic hemodialysis            | NR                                       | <ul style="list-style-type: none"> <li>• Isotonic NaHCO<sub>3</sub> in dextrose + insulin IV</li> <li>• Isotonic NaHCO<sub>3</sub> IV + nebulized albuterol</li> </ul>                                                                       | <ul style="list-style-type: none"> <li>• Nebulized albuterol 10 mg + isotonic saline IV</li> <li>• Isotonic saline IV</li> <li>• Isotonic NaHCO<sub>3</sub> at 90 mmol/h IV</li> <li>• Insulin 5 mU/kg/min + dextrose IV</li> </ul> | <ul style="list-style-type: none"> <li>• HCO<sub>3</sub> + Insulin 4.23 (0.37)</li> <li>• HCO<sub>3</sub> + Albuterol 4.34 (0.54)</li> </ul>                                                                                                 | <ul style="list-style-type: none"> <li>• HCO<sub>3</sub> + Insulin 3.58 (NR)<br/>3.44 (NR)</li> <li>• HCO<sub>3</sub> + Albuterol 3.79 (NR)<br/>3.63 (NR)</li> </ul>                                                                                                                                 |
| Ngugi, 1997 (n=70) <sup>3</sup>                                                                                                                                                                                                                                                                                    | RCT            | ARF patients (n=10) and CRF patients (n=60) | K <sup>+</sup> > 5.0 mmol/L              | <ul style="list-style-type: none"> <li>• Insulin 10U + NaHCO<sub>3</sub> IV</li> <li>• Insulin 10U + Albuterol 0.5 mL IV</li> <li>• NaHCO<sub>3</sub> + Albuterol 0.5 mL IV</li> <li>• Insulin + Albuterol + NaHCO<sub>3</sub> IV</li> </ul> | <ul style="list-style-type: none"> <li>• Insulin 10 U IV + dextrose</li> <li>• Albuterol 0.5 mL IV</li> <li>• NaHCO<sub>3</sub> at 3.3 mmol/min IV x 15 min</li> </ul>                                                              | <ul style="list-style-type: none"> <li>• Insulin + HCO<sub>3</sub> 5.77 (NR)</li> <li>• Insulin + Albuterol 6.19 (NR)</li> <li>• HCO<sub>3</sub> + Albuterol 5.92 (NR)</li> <li>• HCO<sub>3</sub> + Albuterol + Insulin 6.63 (NR)</li> </ul> | <ul style="list-style-type: none"> <li>• Insulin + HCO<sub>3</sub> 4.95 (NR)<br/>4.57 (NR)</li> <li>• Insulin + Albuterol 5.15 (NR)<br/>4.79 (NR)</li> <li>• HCO<sub>3</sub> + Albuterol 5.19 (NR)<br/>5.03 (NR)</li> <li>• HCO<sub>3</sub> + Albuterol + Insulin 5.40 (NR)<br/>5.00 (NR)</li> </ul> |
| Gruy-Kapral, 1998 (n=6) <sup>4</sup>                                                                                                                                                                                                                                                                               | RCT cross-over | Patients on chronic hemodialysis            | NR                                       | <ul style="list-style-type: none"> <li>• Phenolphthalein-docusate + Resin</li> <li>• Sorbitol + Resin</li> </ul>                                                                                                                             | <ul style="list-style-type: none"> <li>• 8 gelatin capsules/placebo</li> <li>• Phenolphthalein-docusate</li> <li>• Sodium polystyrene sulfonate 30g</li> </ul>                                                                      | <ul style="list-style-type: none"> <li>• Phenolphthalein-docusate + Resin 4.35 (0.64)</li> <li>• Sorbitol + Resin 4.27 (0.93)</li> </ul>                                                                                                     | <ul style="list-style-type: none"> <li>• Phenolphthalein-docusate + Resin NR<br/>4.42 (1.00) 240 min</li> <li>• Sorbitol + Resin NR<br/>4.31 (1.08) 240 min</li> </ul>                                                                                                                               |
| <p>*K<sup>+</sup> values in intervention group.<br/>Abbreviations: K<sup>+</sup>, serum potassium; t, time; SD, standard deviation; RCT, randomized controlled trial; U, units; IV, intravenous; NR, not reported; ARF, acute renal failure; CRF, chronic renal failure; NaHCO<sub>3</sub>, sodium bicarbonate</p> |                |                                             |                                          |                                                                                                                                                                                                                                              |                                                                                                                                                                                                                                     |                                                                                                                                                                                                                                              |                                                                                                                                                                                                                                                                                                      |

**References**

1. Allon M, Copkney C. Albuterol and insulin for treatment of hyperkalemia in hemodialysis patients. *Kidney Int* 1990;38:869-72.
2. Allon M, Shanklin N. Effect of bicarbonate administration on plasma potassium in dialysis patients: interactions with insulin and albuterol. *Am J Kidney Dis* 1996;28:508-14.
3. Ngugi NN, McLigeyo SO, Kayima JK. Treatment of hyperkalaemia by altering the transcellular gradient in patients with renal failure: effect of various therapeutic approaches. *East Afr Med J* 1997;74:503-9.
4. Gruy-Kapral C, Emmett M, Santa Ana CA, et al. Effect of single dose resin-cathartic therapy on serum potassium concentration in patients with end-stage renal disease. *J Am Soc Nephrol* 1998;9:1924-30.
